# Supplementary material for: Regulation of sleep homeostasis by sexual arousal
Source: eLife journal article supplement (doi:10.7554/elife.27445), 2017-09-11
Supplement: supp [file elife-27445-supp-v1.zip]

Archive with 9 entries (9 files):
- elife_poa_e27445_Supplementary_File_1.txt
- elife_poa_e27445_Figure_1_figure_supplement_3.svg
- elife_poa_e27445_Figure_1_figure_supplement_1.svg
- elife_poa_e27445_Figure_2_figure_supplement_2.svg
- elife_poa_e27445_Figure_2_figure_supplement_1.svg
- elife_poa_e27445_Transparent_Reporting_File.pdf
- elife_poa_e27445_Figure_1_figure_supplement_2.svg
- elife_poa_e27445_Figure_6_figure_supplement_1.svg
- elife_poa_e27445_Figure_5_figure_supplement_1.svg
