# Supplementary material for: Regulation of sleep homeostasis by sexual arousal
Source: eLife journal article supplement (doi:10.7554/elife.27445), 2017-09-11
Supplement: supp [file elife-27445-supp-v1.zip › elife_poa_e27445_Supplementary_File_1.txt]

Figure 1B

        treatment   N
1:  mock-original 114
2: aggSD-original 107
3: sexSD-original 111

	Pairwise comparisons using Wilcoxon rank sum test 

data:  dt_summary$sleep_fraction and dt_summary$treatment

               mock-original aggSD-original    
aggSD-original   5.3e-13       -             
sexSD-original   0.56454       6.4e-09       

P value adjustment method: fdr 

-----------------------------------------------------------------------
Figure 1C

        treatment   N
1:  mock-original 114
2: aggSD-original 107
3: sexSD-original 111

	Pairwise comparisons using Wilcoxon rank sum test 

data:  dt_summary1$sleep_fraction and dt_summary1$treatment 

               mock-original aggSD-original
aggSD-original <2e-16        -             
sexSD-original <2e-16        <2e-16        

P value adjustment method: fdr 

-----------------------------------------------------------------------
Figure 1F

   treatment  N
1:     aggSD 13
2:    mechSD  9
3:      mock  9
4:     sexSD 10

	Pairwise comparisons using Wilcoxon rank sum test 

data:  dt$final_value and dt$treatment 

       mock  mechSD aggSD
mechSD 0.049 -      -    
aggSD  0.033 0.744  -    
sexSD  0.049 0.744  0.744

P value adjustment method: fdr 

-----------------------------------------------------------------------
Figure 1S1A

        treatment   N
1:  mock-original 114
2: aggSD-original 107
3: sexSD-original 111

	Pairwise comparisons using Wilcoxon rank sum test 

data:  summary_bout$mean_length and summary_bout$treatment 

               mock-original aggSD-original7.1e-13
aggSD-original 0.70578       -             
sexSD-original 0.00545       0.00045       

P value adjustment method: fdr 

-----------------------------------------------------------------------
Figure 1S1B

        treatment   N
1:  mock-original 114
2: aggSD-original 107
3: sexSD-original 111

	Pairwise comparisons using Wilcoxon rank sum test 

data:  summary_bout$n and summary_bout$treatment 

               mock-original aggSD-original
aggSD-original 7.1e-13       -             
sexSD-original 0.21          1.2e-07       

P value adjustment method: fdr 

-----------------------------------------------------------------------
Figure 1S3B

        treatment   N
1:  mock-original 114
2: aggSD-original 107
3: sexSD-original 111

	Pairwise comparisons using Wilcoxon rank sum test 

data:  dt_summary$sleep_fraction and dt_summary$treatment 

               mock-original aggSD-original
aggSD-original <2e-16        -             
sexSD-original 0.0043        2e-09         

P value adjustment method: fdr 

-----------------------------------------------------------------------
Figure 2A

   treatment  N
1:     sexSD 35
2:     aggSD 35
3:      mock 35

	Pairwise comparisons using Wilcoxon rank sum test 

data:  dt_summary$sleep_fraction and dt_summary$treatment

       mock    aggSD  
aggSD 5.3e-10 -      
sexSD 0.00101 7.6e-07

P value adjustment method: fdr 

-----------------------------------------------------------------------	
Figure 2B

   treatment  N
1:      mock 37
2:     sexSD 38
3:     aggSD 38

	Pairwise comparisons using Wilcoxon rank sum test 

data:  dt_summary$sleep_fraction and dt_summary$treatment

      mock    aggSD  
aggSD 4.1e-08 -      
sexSD 0.26    5.4e-06

P value adjustment method: fdr 

-----------------------------------------------------------------------	
Figure 2C

            treatment  N
1:     sexSD_simulans 38
2:               mock 40
3:              aggSD 37
4: sexSD_melanogaster 35

	Pairwise comparisons using Wilcoxon rank sum test 

data:  dt_summary$sleep_fraction and dt_summary$treatment

                   mock    aggSD  sexSD_melanogaster
aggSD              0.0030  -      -                 
sexSD_melanogaster 0.8070  0.0012 -                 
sexSD_simulans     2.6e-06 0.0084 1.5e-07           

P value adjustment method: fdr 

-----------------------------------------------------------------------	
Figure 2D

   treatment  N
1:      mock 51
2:     aggSD 63
3:     sexSD 64

	Pairwise comparisons using Wilcoxon rank sum test 

data:  dt_summary$sleep_fraction and dt_summary$treatment

      mock    aggSD  
aggSD 0.00173 -      
sexSD 0.12341 2.2e-05

P value adjustment method: fdr 

-----------------------------------------------------------------------	
Figure 2E

   treatment  N
1: aggSD_veh 73
2:      mock 75
3: aggSD_phe 74

	Pairwise comparisons using Wilcoxon rank sum test 

data:  dt_summary$sleep_fraction and     dt_summary$treatment

          mock    aggSD_veh
aggSD_veh 2.4e-06 -        
aggSD_phe 0.096   0.011    

P value adjustment method: fdr

-----------------------------------------------------------------------	
Figure 3A

   treatment  N
1: aggSD_veh 34
2:      mock 57
3:     aggSD 54
4: aggSD_phe 57
5:     sexSD 55

	Pairwise comparisons using Wilcoxon rank sum test 

data:  dt_summary$sleep_fraction and dt_summary$treatment

          mock    aggSD  sexSD  aggSD_veh
aggSD     0.0176  -      -      -        
sexSD     0.0085  0.8249 -      -        
aggSD_veh 7.1e-05 0.1302 0.0522 -        
aggSD_phe 0.0195  0.8249 0.8249 0.0502   

P value adjustment method: fdr 

-----------------------------------------------------------------------	
Figure 4

           treatment  N
1:    dynamic-F_tube 44
2:       mock-F_tube 44
3:     mock-new_tube 44
4:  dynamic-new_tube 37
5:    mock-same_tube 60
6: dynamic-same_tube 56

	Pairwise comparisons using Wilcoxon rank sum test 

data:  dt_summary$sleep_fraction and dt_summary$treatment 

                  mock-same_tube dynamic-same_tube mock-new_tube dynamic-new_tube  mock-F_tube
dynamic-same_tube 0.040          -                 -             -                 -        
mock-new_tube     0.437          0.013             -             -                 -      
dynamic-new_tube  0.211          0.290             0.033         -                 - 
mock-F_tube       0.518          0.099             0.099         0.307             -
dynamic-F_tube    0.201          0.290             0.013         0.855             0.201      


P value adjustment method: fdr 

-----------------------------------------------------------------------	
Figure 5 and 5S1

                     treatment  N
 1: ppk23G4-TRPA1_dynamic-heat 54
 2:    ppk23G4-TRPA1_mock-heat 56
 3:     ppk23G4/+_dynamic-heat 45
 4:        ppk23G4/+_mock-heat 49
 5:       TRPA1/+_dynamic-heat 46
 6:          TRPA1/+_mock-heat 50
 7:     ppk23G4/+_dynamic-cold 33
 8:        ppk23G4/+_mock-cold 36
 9: ppk23G4-TRPA1_dynamic-cold 35
10:    ppk23G4-TRPA1_mock-cold 36
11:       TRPA1/+_dynamic-cold 35
12:          TRPA1/+_mock-cold 36

	Pairwise comparisons using Wilcoxon rank sum test 

data:  dt_summary$sleep_fraction and dt_summary$treatment 

                           ppk23G4/+_mock-cold ppk23G4/+_dynamic-cold ppk23G4/+_mock-heat
ppk23G4/+_dynamic-cold     9.4e-05             -                      -                  
ppk23G4/+_mock-heat        0.28090             0.00166                -                  
ppk23G4/+_dynamic-heat     0.00018             0.36553                0.00565            
TRPA1/+_mock-cold          0.85673             2.1e-05                0.20488            
TRPA1/+_dynamic-cold       0.00633             0.27191                0.08224            
TRPA1/+_mock-heat          0.78849             1.6e-05                0.36553            
TRPA1/+_dynamic-heat       0.00283             0.05444                0.08224            
ppk23G4-TRPA1_mock-cold    0.00242             1.3e-06                2.6e-05            
ppk23G4-TRPA1_dynamic-cold 0.16948             0.00138                0.79209            
ppk23G4-TRPA1_mock-heat    0.36553             1.3e-05                0.04163            
ppk23G4-TRPA1_dynamic-heat 0.76981             8.7e-05                0.39088            
                           ppk23G4/+_dynamic-heat TRPA1/+_mock-cold TRPA1/+_dynamic-cold
ppk23G4/+_dynamic-cold     -                      -                 -                   
ppk23G4/+_mock-heat        -                      -                 -                   
ppk23G4/+_dynamic-heat     -                      -                 -                   
TRPA1/+_mock-cold          3.3e-05                -                 -                   
TRPA1/+_dynamic-cold       0.69037                0.00242           -                   
TRPA1/+_mock-heat          3.8e-05                0.58843           0.00335             
TRPA1/+_dynamic-heat       0.28090                0.00083           0.61309             
ppk23G4-TRPA1_mock-cold    1.8e-07                0.00078           1.3e-05             
ppk23G4-TRPA1_dynamic-cold 0.00495                0.12177           0.05249             
ppk23G4-TRPA1_mock-heat    1.3e-05                0.43614           0.00141             
ppk23G4-TRPA1_dynamic-heat 0.00018                0.63294           0.00579             
                           TRPA1/+_mock-heat TRPA1/+_dynamic-heat ppk23G4-TRPA1_mock-cold
ppk23G4/+_dynamic-cold     -                 -                    -                      
ppk23G4/+_mock-heat        -                 -                    -                      
ppk23G4/+_dynamic-heat     -                 -                    -                      
TRPA1/+_mock-cold          -                 -                    -                      
TRPA1/+_dynamic-cold       -                 -                    -                      
TRPA1/+_mock-heat          -                 -                    -                      
TRPA1/+_dynamic-heat       0.00083           -                    -                      
ppk23G4-TRPA1_mock-cold    9.3e-05           4.3e-06              -                      
ppk23G4-TRPA1_dynamic-cold 0.16948           0.12184              0.00013                
ppk23G4-TRPA1_mock-heat    0.12184           0.00014              0.00078                
ppk23G4-TRPA1_dynamic-heat 0.91967           0.00443              0.00078                
                           ppk23G4-TRPA1_dynamic-cold ppk23G4-TRPA1_mock-heat
ppk23G4/+_dynamic-cold     -                          -                      
ppk23G4/+_mock-heat        -                          -                      
ppk23G4/+_dynamic-heat     -                          -                      
TRPA1/+_mock-cold          -                          -                      
TRPA1/+_dynamic-cold       -                          -                      
TRPA1/+_mock-heat          -                          -                      
TRPA1/+_dynamic-heat       -                          -                      
ppk23G4-TRPA1_mock-cold    -                          -                      
ppk23G4-TRPA1_dynamic-cold -                          -                      
ppk23G4-TRPA1_mock-heat    0.04163                    -                      
ppk23G4-TRPA1_dynamic-heat 0.34416                    0.20566                

P value adjustment method: fdr 

	Pairwise comparisons using Wilcoxon rank sum test 

-----------------------------------------------------------------------	
Figure 6B

        treatment  N
1:      aggSD-new 37
2:      sexSD-new 38
3:       mock-new 39

	Pairwise comparisons using Wilcoxon rank sum test 

data:  dt_summary$sleep_fraction and dt_summary$treatment

          mock-new aggSD-new
aggSD-new 0.00055  -        
sexSD-new 0.81049  0.00068  

P value adjustment method: fdr 	

-----------------------------------------------------------------------	
Figure 6DFH

                 treatment  N
1:      ppk23G4/+-mock-29C 58
2:        shiTS/+-mock-29C 60
3:  ppk23G4-shiTS-mock-29C 59
4:       shiTS/+-sexSD-29C 56
5: ppk23G4-shiTS-sexSD-29C 58
6:     ppk23G4/+-sexSD-29C 57
            
	Pairwise comparisons using Wilcoxon rank sum test 

data:  dt_summary$sleep_fraction and dt_summary$treatment 

                        ppk23G4-shiTS-mock-29C ppk23G4-shiTS-sexSD-29C ppk23G4/+-mock-29C
ppk23G4-shiTS-sexSD-29C 0.02844                -                       -                 
ppk23G4/+-mock-29C      0.00023                0.16978                 -                 
ppk23G4/+-sexSD-29C     1.5e-07                0.00031                 0.00560           
shiTS/+-mock-29C        0.00023                0.13215                 0.88019           
shiTS/+-sexSD-29C       2.7e-06                0.00560                 0.07821           
                        ppk23G4/+-sexSD-29C shiTS/+-mock-29C
ppk23G4-shiTS-sexSD-29C -                   -               
ppk23G4/+-mock-29C      -                   -               
ppk23G4/+-sexSD-29C     -                   -               
shiTS/+-mock-29C        0.00560             -               
shiTS/+-sexSD-29C       0.36446             0.10628         

P value adjustment method: fdr 


-----------------------------------------------------------------------	
Figure 7C and 7E

      treatment  N
1:  TRPA1/+-29C  63
2: P1-TRPA1-22C  54
3:     P1/+-22C  28
4:  TRPA1/+-22C  27
5: P1-TRPA1-29C  70
6:     P1/+-29C  40

	Pairwise comparisons using Wilcoxon rank sum test 

data:  dt_summary$sleep_fraction and dt_summarytreatment  

             TRPA1/+-22C P1/+-22C P1-TRPA1-22C TRPA1/+-29C P1/+-29C
P1/+-22C     0.76424     -        -            -           -       
P1-TRPA1-22C 0.09845     0.09845  -            -           -       
TRPA1/+-29C  0.62397     0.38965  0.00093      -           -       
P1/+-29C     0.46298     0.31498  0.00126      0.61045     -       
P1-TRPA1-29C 8.0e-09     5.6e-08  3.2e-05      1.2e-13     2.6e-12 

P value adjustment method: fdr 

	Pairwise comparisons using Wilcoxon rank sum test 

data:  dt_summaryZT00_ZT12$sleep_fraction and dt_summaryZT00_ZT12$treatment

             TRPA1/+-22C P1/+-22C P1-TRPA1-22C TRPA1/+-29C P1/+-29C
P1/+-22C     0.6447      -        -            -           -       
P1-TRPA1-22C 0.5720      0.9961   -            -           -       
TRPA1/+-29C  0.0069      0.1076   0.0370       -           -       
P1/+-29C     0.3205      0.5720   0.4947       0.3485      -       
P1-TRPA1-29C 7.6e-07     2.1e-05  3.7e-09      7.3e-07     2.1e-05 

P value adjustment method: fdr 

	Pairwise comparisons using Wilcoxon rank sum test 

data:  dt_summaryZT12_ZT24$sleep_fraction and dt_summaryZT12_ZT24$treatment

             TRPA1/+-22C P1/+-22C P1-TRPA1-22C TRPA1/+-29C P1/+-29C
P1/+-22C     0.67        -        -            -           -       
P1-TRPA1-22C 0.51        0.93     -            -           -       
TRPA1/+-29C  0.51        0.95     0.93         -           -       
P1/+-29C     0.51        0.93     0.99         0.92        -       
P1-TRPA1-29C 0.93        0.90     0.51         0.51        0.51    

P value adjustment method: fdr 

-----------------------------------------------------------------------	
Figure 8C

   treatment  N
1:      mock 50
2:     aggSD 52
3:     sexSD 55

	Pairwise comparisons using Wilcoxon rank sum test 

data:  dt_summary$sleep_fraction and dt_summary$treatment

      mock    aggSD  
aggSD 1.9e-12 -      
sexSD 0.023   9.7e-16

P value adjustment method: fdr 

-----------------------------------------------------------------------	
Figure 8E

   treatment  N
1:     sexSD 39
2:      mock 22
3:     aggSD 24

	Pairwise comparisons using Wilcoxon rank sum test 

data:  dt_summary$sleep_fraction and dt_summary$treatment

      mock  aggSD
aggSD 0.068 -    
sexSD 0.846 0.037

P value adjustment method: fdr 
